# Supplementary material for: Genetic diversity analysis of French goat populations reveals selective sweeps involved in their differentiation
Source: PubMed Central journal article supplement (PMC6590323; doi:10.1111/age.12752), 2018-12-13

**Figure S2** Measuring models fit in TREEMIX.  $m$  is the number of added migration events,  $f$  the fraction of the variance in relatedness between populations that is accounted for by the models.

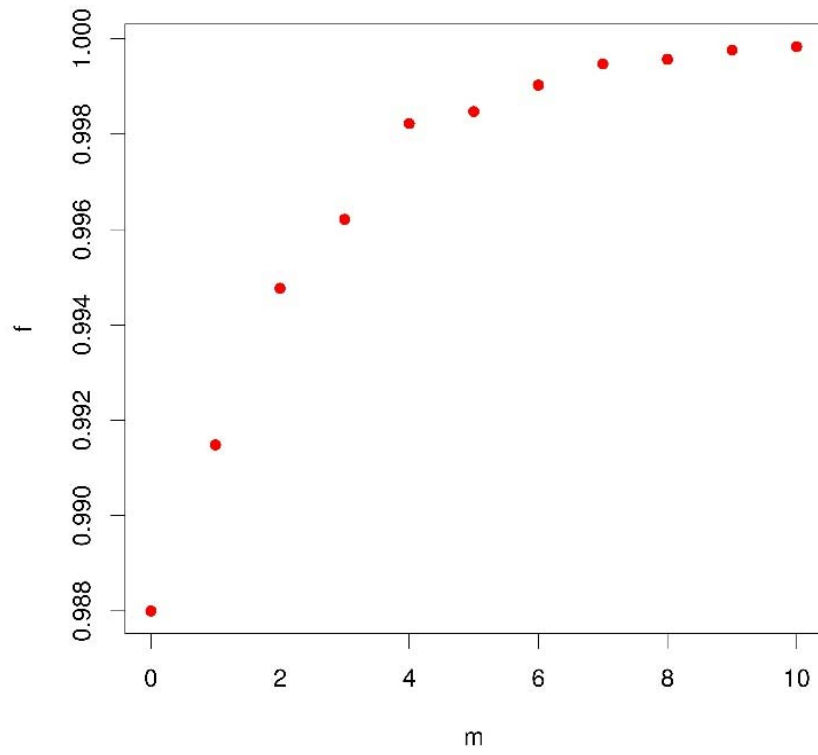

Supplement: AGE-50-54-s002.pdf [file AGE-50-54-s002.pdf]
