# Supplementary material for: Genetic diversity analysis of French goat populations reveals selective sweeps involved in their differentiation
Source: PubMed Central journal article supplement (PMC6590323; doi:10.1111/age.12752), 2018-12-13

**Figure S3** Boxplots of average runs of homozygosity (ROH) lengths (top) and number of ROH for each population.

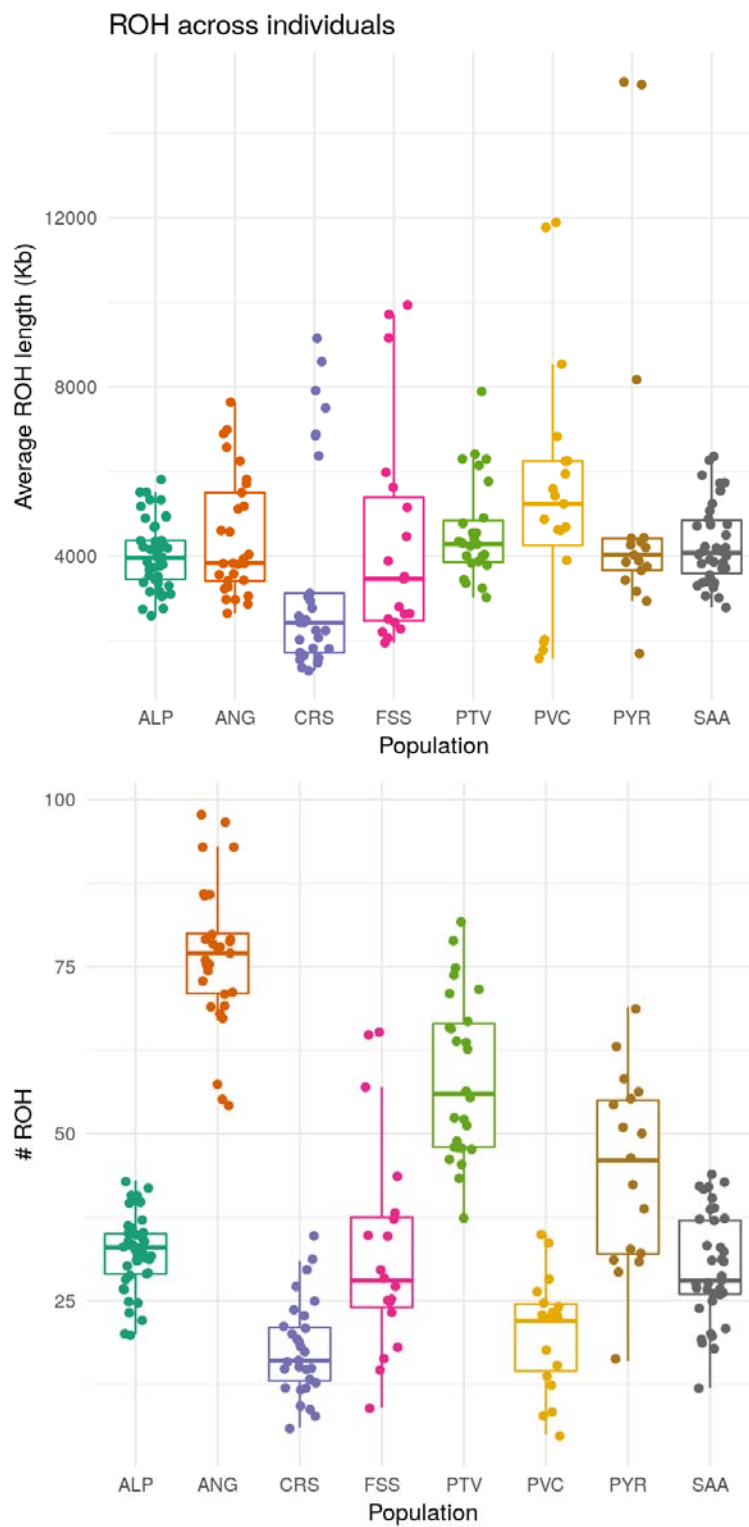

Supplement: AGE-50-54-s003.pdf [file AGE-50-54-s003.pdf]
